# Supplementary material for: A Traffic Light System to Maximize Carbohydrate Cryoprotectants’ Effectivity in Nanostructured Lipid Carriers’ Lyophilization
Source: MDPI journal article supplement (doi:10.3390/pharmaceutics13091330), 2021-08-25
Supplement: s1 [file s1]

# Supplementary Materials: A Traffic Light System to Maximize Carbohydrate Cryoprotectants' Effectivity in Nanostructured Lipid Carriers' Lyophilization

**Table S1.** Set of combined IF-THEN rules for  $\Delta$  size of the first NFL model. Degree of membership in parentheses.

| Rules for $\Delta$ size                                                         |                            |             |
|---------------------------------------------------------------------------------|----------------------------|-------------|
| 1. IF Velocity is Fast AND CP is Fructose AND IF %CP is HIGH AND CP is Fructose | THEN $\Delta$ size (nm) is | HIGH (0.60) |
| 2. IF Velocity is Fast AND CP is Fructose AND IF %CP is LOW AND CP is Fructose  | THEN $\Delta$ size (nm) is | LOW (0.82)  |
| 3. IF Velocity is Fast AND CP is Fructose AND IF %CP is MID AND CP is Fructose  | THEN $\Delta$ size (nm) is | LOW (0.89)  |
| 4. IF Velocity is Slow AND CP is Fructose AND IF %CP is HIGH AND CP is Fructose | THEN $\Delta$ size (nm) is | HIGH (0.86) |
| 5. IF Velocity is Slow AND CP is Fructose AND IF %CP is LOW AND CP is Fructose  | THEN $\Delta$ size (nm) is | LOW (0.56)  |
| 6. IF Velocity is Slow AND CP is Fructose AND IF %CP is MID AND CP is Fructose  | THEN $\Delta$ size (nm) is | LOW (0.63)  |
| 7. IF Velocity is Fast AND CP is Glucose AND IF %CP is HIGH AND CP is Glucose   | THEN $\Delta$ size (nm) is | LOW (0.56)  |
| 8. IF Velocity is Fast AND CP is Glucose AND IF %CP is LOW AND CP is Glucose    | THEN $\Delta$ size (nm) is | LOW (0.99)  |
| 9. IF Velocity is Fast AND CP is Glucose AND IF %CP is MID AND CP is Glucose    | THEN $\Delta$ size (nm) is | LOW (0.90)  |
| 10. IF Velocity is Slow AND CP is Glucose AND IF %CP is HIGH AND CP is Glucose  | THEN $\Delta$ size (nm) is | HIGH (0.72) |
| 11. IF Velocity is Slow AND CP is Glucose AND IF %CP is LOW AND CP is Glucose   | THEN $\Delta$ size (nm) is | LOW (0.72)  |
| 12. IF Velocity is Slow AND CP is Glucose AND IF %CP is MID AND CP is Glucose   | THEN $\Delta$ size (nm) is | LOW (0.62)  |
| 13. IF Velocity is Fast AND CP is Lactose AND IF %CP is HIGH AND CP is Lactose  | THEN $\Delta$ size (nm) is | LOW (0.74)  |

---

|                                                                                  |                            |             |
|----------------------------------------------------------------------------------|----------------------------|-------------|
| 14. IF Velocity is Fast AND CP is Lactose AND IF %CP is LOW AND CP is Lactose    | THEN $\Delta$ size (nm) is | LOW (0.81)  |
| 15. IF Velocity is Fast AND CP is Lactose AND IF %CP is MID AND CP is Lactose    | THEN $\Delta$ size (nm) is | LOW (0.88)  |
| 16. IF Velocity is Slow AND CP is Lactose AND IF %CP is HIGH AND CP is Lactose   | THEN $\Delta$ size (nm) is | LOW (0.66)  |
| 17. IF Velocity is Slow AND CP is Lactose AND IF %CP is LOW AND CP is Lactose    | THEN $\Delta$ size (nm) is | LOW (0.73)  |
| 18. IF Velocity is Slow AND CP is Lactose AND IF %CP is MID AND CP is Lactose    | THEN $\Delta$ size (nm) is | LOW (0.81)  |
| 19. IF Velocity is Fast AND CP is Mannitol AND IF %CP is HIGH AND CP is Mannitol | THEN $\Delta$ size (nm) is | LOW (0.71)  |
| 20. IF Velocity is Fast AND CP is Mannitol AND IF %CP is LOW AND CP is Mannitol  | THEN $\Delta$ size (nm) is | HIGH (0.77) |
| 21. IF Velocity is Fast AND CP is Mannitol AND IF %CP is MID AND CP is Mannitol  | THEN $\Delta$ size (nm) is | LOW (0.60)  |
| 22. IF Velocity is Slow AND CP is Mannitol AND IF %CP is HIGH AND CP is Mannitol | THEN $\Delta$ size (nm) is | LOW (0.62)  |
| 23. IF Velocity is Slow AND CP is Mannitol AND IF %CP is LOW AND CP is Mannitol  | THEN $\Delta$ size (nm) is | HIGH (0.86) |
| 24. IF Velocity is Slow AND CP is Mannitol AND IF %CP is MID AND CP is Mannitol  | THEN $\Delta$ size (nm) is | LOW (0.50)  |
| 25. IF Velocity is Fast AND CP is Sorbitol AND IF %CP is HIGH AND CP is Sorbitol | THEN $\Delta$ size (nm) is | HIGH (0.50) |
| 26. IF Velocity is Fast AND CP is Sorbitol AND IF %CP is LOW AND CP is Sorbitol  | THEN $\Delta$ size (nm) is | LOW (0.51)  |
| 27. IF Velocity is Fast AND CP is Sorbitol AND IF %CP is MID AND CP is Sorbitol  | THEN $\Delta$ size (nm) is | LOW (0.66)  |
| 28. IF Velocity is Slow AND CP is Sorbitol AND IF %CP is HIGH AND CP is Sorbitol | THEN $\Delta$ size (nm) is | HIGH (0.61) |
| 29. IF Velocity is Slow AND CP is Sorbitol AND IF %CP is LOW AND CP is Sorbitol  | THEN $\Delta$ size (nm) is | HIGH (0.60) |

---

|                                                                                      |                            |             |
|--------------------------------------------------------------------------------------|----------------------------|-------------|
| 30. IF Velocity is Slow AND CP is Sorbitol AND IF %CP is MID AND CP is Sorbitol THEN | THEN $\Delta$ size (nm) is | LOW (0.55)  |
| 31. IF Velocity is Fast AND CP is Sucrose AND IF %CP is HIGH AND CP is Sucrose       | THEN $\Delta$ size (nm) is | LOW (0.94)  |
| 32. IF Velocity is Fast AND CP is Sucrose AND IF %CP is LOW AND CP is Sucrose        | THEN $\Delta$ size (nm) is | HIGH (0.75) |
| 33. IF Velocity is Fast AND CP is Sucrose AND IF %CP is MID AND CP is Sucrose        | THEN $\Delta$ size (nm) is | LOW (0.76)  |
| 34. IF Velocity is Slow AND CP is Sucrose AND IF %CP is HIGH AND CP is Sucrose       | THEN $\Delta$ size (nm) is | LOW (0.88)  |
| 35. IF Velocity is Slow AND CP is Sucrose AND IF %CP is LOW AND CP is Sucrose        | THEN $\Delta$ size (nm) is | HIGH (0.82) |
| 36. IF Velocity is Slow AND CP is Sucrose AND IF %CP is MID AND CP is Sucrose        | THEN $\Delta$ size (nm) is | LOW (0.70)  |
| 37. IF Velocity is Fast AND CP is Trehalose AND IF %CP is HIGH AND CP is Trehalose   | THEN $\Delta$ size (nm) is | LOW (0.71)  |
| 38. IF Velocity is Fast AND CP is Trehalose AND IF %CP is LOW AND CP is Trehalose    | THEN $\Delta$ size (nm) is | LOW (0.68)  |
| 39. IF Velocity is Fast AND CP is Trehalose AND IF %CP is MID AND CP is Trehalose    | THEN $\Delta$ size (nm) is | LOW (0.85)  |
| 40. IF Velocity is Slow AND CP is Trehalose AND IF %CP is HIGH AND CP is Trehalose   | THEN $\Delta$ size (nm) is | LOW (0.72)  |
| 41. IF Velocity is Slow AND CP is Trehalose AND IF %CP is LOW AND CP is Trehalose    | THEN $\Delta$ size (nm) is | LOW (0.69)  |
| 42. IF Velocity is Slow AND CP is Trehalose AND IF %CP is MID AND CP is Trehalose    | THEN $\Delta$ size (nm) is | LOW (0.86)  |

**Table S2.** Set of combined IF-THEN rules for  $\Delta$  PdI of the first NFL model. Degree of membership in parentheses.

| Rules for $\Delta$ PdI                                                           |                      |            |
|----------------------------------------------------------------------------------|----------------------|------------|
| 1. IF %CP is LOW AND CP is Fructose AND IF Velocity is Fast AND IF %CP is MID-3  | THEN $\Delta$ PdI is | LOW (1.00) |
| 2. IF %CP is LOW AND CP is Fructose AND IF Velocity is Fast AND IF % CP is LOW-1 | THEN $\Delta$ PdI is | LOW (1.00) |

---

|                                                                                       |                      |                |
|---------------------------------------------------------------------------------------|----------------------|----------------|
| 3. IF %CP is LOW AND CP is Fructose AND IF Velocity is Fast<br>AND IF %CP is MID-2    | THEN $\Delta$ PdI is | LOW<br>(0.92)  |
| 4. IF %CP is HIGH AND CP is Fructose AND IF Velocity is Fast<br>AND IF %CP is MID-3   | THEN $\Delta$ PdI is | LOW<br>(0.71)  |
| 5. IF %CP is HIGH AND CP is Fructose AND IF Velocity is Fast<br>AND IF %CP is HIGH-4  | THEN $\Delta$ PdI is | HIGH<br>(0.63) |
| 6. IF %CP is LOW AND CP is Fructose AND IF Velocity is Slow<br>AND IF %CP is MID-3    | THEN $\Delta$ PdI is | LOW<br>(0.88)  |
| 7. IF %CP is LOW AND CP is Fructose AND IF Velocity is Slow<br>AND IF %CP is LOW-1    | THEN $\Delta$ PdI is | LOW<br>(0.87)  |
| 8. IF %CP is LOW AND CP is Fructose AND IF Velocity is Slow<br>AND IF %CP is MID-2    | THEN $\Delta$ PdI is | LOW<br>(0.77)  |
| 9. IF % CP is HIGH AND CP is Fructose AND IF Velocity is<br>Slow AND IF %CP is MID-3  | THEN $\Delta$ PdI is | LOW<br>(0.56)  |
| 10. IF %CP is HIGH AND CP is Fructose AND IF Velocity is<br>Slow AND IF %CP is HIGH-4 | THEN $\Delta$ PdI is | HIGH<br>(0.78) |
| 11. IF %CP is LOW AND CP is Glucose AND IF Velocity is Fast<br>AND IF %CP is MID-3    | THEN $\Delta$ PdI is | LOW<br>(1.00)  |
| 12. IF %CP is LOW AND CP is Glucose AND IF Velocity is Fast<br>AND IF %CP is LOW-1    | THEN $\Delta$ PdI is | LOW<br>(1.00)  |
| 13. IF %CP is LOW AND CP is Glucose AND IF Velocity is Fast<br>AND IF %CP is MID-2    | THEN $\Delta$ PdI is | LOW<br>(0.97)  |
| 14. IF %CP is HIGH AND CP is Glucose AND IF Velocity is Fast<br>AND IF %CP is MID-3   | THEN $\Delta$ PdI is | LOW<br>(0.62)  |
| 15. IF %CP is HIGH AND CP is Glucose AND IF Velocity is Fast<br>AND IF %CP is HIGH-4  | THEN $\Delta$ PdI is | HIGH<br>(0.72) |
| 16. IF %CP is LOW AND CP is Glucose AND IF Velocity is Slow<br>AND IF %CP is MID-3    | THEN $\Delta$ PdI is | LOW<br>(0.94)  |
| 17. IF %CP is LOW AND CP is Glucose AND IF Velocity is Slow<br>AND IF %CP is LOW-1    | THEN $\Delta$ PdI is | LOW<br>(0.92)  |
| 18. IF %CP is LOW AND CP is Glucose AND IF Velocity is Slow<br>AND IF %CP is MID-2    | THEN $\Delta$ PdI is | LOW<br>(0.82)  |

---

---

|                                                                                    |                      |                |
|------------------------------------------------------------------------------------|----------------------|----------------|
| 19. IF %CP is HIGH AND CP is Glucose AND IF Velocity is Slow AND IF %CP is MID-3   | THEN $\Delta$ PdI is | HIGH<br>(0.54) |
| 20. IF %CP is HIGH AND CP is Glucose AND IF Velocity is Slow AND IF %CP is HIGH-4  | THEN $\Delta$ PdI is | HIGH<br>(0.87) |
| 21. IF %CP is LOW AND CP is Lactose AND IF Velocity is Fast AND IF %CP is MID-3    | THEN $\Delta$ PdI is | LOW<br>(1.00)  |
| 22. IF %CP is LOW AND CP is Lactose AND IF Velocity is Fast AND IF %CP is LOW-1    | THEN $\Delta$ PdI is | LOW<br>(1.00)  |
| 23. IF %CP is LOW AND CP is Lactose AND IF Velocity is Fast AND IF %CP is MID-2    | THEN $\Delta$ PdI is | LOW<br>(0.90)  |
| 24. IF %CP is HIGH AND CP is Lactose AND IF Velocity is Fast AND IF %CP is MID-3   | THEN $\Delta$ PdI is | LOW<br>(0.73)  |
| 25. IF %CP is HIGH AND CP is Lactose AND IF Velocity is Fast AND IF %CP is HIGH-4  | THEN $\Delta$ PdI is | HIGH<br>(0.61) |
| 26. IF %CP is LOW AND CP is Lactose AND IF Velocity is Slow AND IF %CP is MID-3    | THEN $\Delta$ PdI is | LOW<br>(0.86)  |
| 27. IF %CP is LOW AND CP is Lactose AND IF Velocity is Slow AND IF %CP is LOW-1    | THEN $\Delta$ PdI is | LOW<br>(0.85)  |
| 28. IF %CP is LOW AND CP is Lactose AND IF Velocity is Slow AND IF %CP is MID-2    | THEN $\Delta$ PdI is | LOW<br>(0.75)  |
| 29. IF %CP is HIGH AND CP is Lactose AND IF Velocity is Slow AND IF %CP is MID-3   | THEN $\Delta$ PdI is | LOW<br>(0.58)  |
| 30. IF %CP is HIGH AND CP is Lactose AND IF Velocity is Slow AND IF %CP is HIGH-4  | THEN $\Delta$ PdI is | HIGH<br>(0.76) |
| 31. IF %CP is HIGH AND CP is Mannitol AND IF Velocity is Fast AND IF %CP is MID-3  | THEN $\Delta$ PdI is | LOW<br>(1.00)  |
| 32. IF %CP is LOW AND CP is Mannitol AND IF Velocity is Fast AND IF %CP is MID-3   | THEN $\Delta$ PdI is | LOW<br>(0.78)  |
| 33. IF %CP is LOW AND CP is Mannitol AND IF Velocity is Fast AND IF %CP is LOW-1   | THEN $\Delta$ PdI is | LOW<br>(0.77)  |
| 34. IF %CP is HIGH AND CP is Mannitol AND IF Velocity is Fast AND IF %CP is HIGH-4 | THEN $\Delta$ PdI is | LOW<br>(0.72)  |

---

---

|                                                                                       |                      |                |
|---------------------------------------------------------------------------------------|----------------------|----------------|
| 35. IF %CP is LOW AND CP is Mannitol AND IF Velocity is Fast<br>AND IF %CP is MID-2   | THEN $\Delta$ PdI is | LOW<br>(0.67)  |
| 36. IF %CP is HIGH AND CP is Mannitol AND IF Velocity is<br>Slow AND IF %CP is MID-3  | THEN $\Delta$ PdI is | LOW<br>(0.91)  |
| 37. IF %CP is LOW AND CP is Mannitol AND IF Velocity is<br>Slow AND IF %CP is MID-3   | THEN $\Delta$ PdI is | LOW<br>(0.63)  |
| 38. IF %CP is LOW AND CP is Mannitol AND IF Velocity is<br>Slow AND IF %CP is LOW-1   | THEN $\Delta$ PdI is | LOW<br>(0.61)  |
| 39. IF %CP is HIGH AND CP is Mannitol AND IF Velocity is<br>Slow AND IF %CP is HIGH-4 | THEN $\Delta$ PdI is | LOW<br>(0.57)  |
| 40. IF %CP is LOW AND CP is Mannitol AND IF Velocity is<br>Slow AND IF %CP is MID-2   | THEN $\Delta$ PdI is | LOW<br>(0.52)  |
| 41. IF %CP is HIGH AND CP is Sorbitol AND IF Velocity is Fast<br>AND IF %CP is MID-3  | THEN $\Delta$ PdI is | LOW<br>(0.88)  |
| 42. IF %CP is LOW AND CP is Sorbitol AND IF Velocity is Fast<br>AND IF %CP is MID-3   | THEN $\Delta$ PdI is | LOW<br>(0.83)  |
| 43. IF %CP is LOW AND CP is Sorbitol AND IF Velocity is Fast<br>AND IF %CP is LOW-1   | THEN $\Delta$ PdI is | LOW<br>(0.82)  |
| 44. IF %CP is LOW AND CP is Sorbitol AND IF Velocity is Fast<br>AND IF %CP is MID-2   | THEN $\Delta$ PdI is | LOW<br>(0.72)  |
| 45. IF %CP is HIGH AND CP is Sorbitol AND IF Velocity is Fast<br>AND IF %CP is HIGH-4 | THEN $\Delta$ PdI is | LOW<br>(0.54)  |
| 46. IF %CP is HIGH AND CP is Sorbitol AND IF Velocity is<br>Slow AND IF %CP is MID-3  | THEN $\Delta$ PdI is | LOW<br>(0.72)  |
| 47. IF %CP is LOW AND CP is Sorbitol AND IF Velocity is Slow<br>AND IF %CP is MID-3   | THEN $\Delta$ PdI is | LOW<br>(0.68)  |
| 48. IF %CP is LOW AND CP is Sorbitol AND IF Velocity is Slow<br>AND IF %CP is LOW-1   | THEN $\Delta$ PdI is | LOW<br>(0.67)  |
| 49. IF %CP is LOW AND CP is Sorbitol AND IF Velocity is Slow<br>AND IF %CP is MID-2   | THEN $\Delta$ PdI is | LOW<br>(0.57)  |
| 50. IF %CP is HIGH AND CP is Sorbitol AND IF Velocity is<br>Slow AND IF %CP is HIGH-4 | THEN $\Delta$ PdI is | HIGH<br>(0.61) |

---

---

|                                                                                        |                      |               |
|----------------------------------------------------------------------------------------|----------------------|---------------|
| 51. IF %CP is HIGH AND CP is Sucrose AND IF Velocity is Fast<br>AND IF %CP is MID-3    | THEN $\Delta$ PdI is | LOW<br>(1.00) |
| 52. IF %CP is HIGH AND CP is Sucrose AND IF Velocity is Fast<br>AND IF %CP is HIGH-4   | THEN $\Delta$ PdI is | LOW<br>(0.85) |
| 53. IF %CP is LOW AND CP is Sucrose AND IF Velocity is Fast<br>AND IF %CP is MID-3     | THEN $\Delta$ PdI is | LOW<br>(0.77) |
| 54. IF %CP is LOW AND CP is Sucrose AND IF Velocity is Fast<br>AND IF %CP is LOW-1     | THEN $\Delta$ PdI is | LOW<br>(0.75) |
| 55. IF %CP is LOW AND CP is Sucrose AND IF Velocity is Fast<br>AND IF %CP is MID-2     | THEN $\Delta$ PdI is | LOW<br>(0.65) |
| 56. IF %CP is HIGH AND CP is Sucrose AND IF Velocity is Slow<br>AND IF %CP is MID-3    | THEN $\Delta$ PdI is | LOW<br>(1.00) |
| 57. IF %CP is HIGH AND CP is Sucrose AND IF Velocity is Slow<br>AND IF %CP is LOW-1    | THEN $\Delta$ PdI is | LOW<br>(1.00) |
| 58. IF %CP is HIGH AND CP is Sucrose AND IF Velocity is Slow<br>AND IF %CP is HIGH-4   | THEN $\Delta$ PdI is | LOW<br>(0.70) |
| 59. IF %CP is LOW AND CP is Sucrose AND IF Velocity is Slow<br>AND IF %CP is MID-3     | THEN $\Delta$ PdI is | LOW<br>(0.61) |
| 60. IF %CP is LOW AND CP is Sucrose AND IF Velocity is Slow<br>AND IF %CP is LOW-1     | THEN $\Delta$ PdI is | LOW<br>(0.60) |
| 61. IF %CP is LOW AND CP is Sucrose AND IF Velocity is Slow<br>AND IF %CP is MID-2     | THEN $\Delta$ PdI is | LOW<br>(0.50) |
| 62. IF %CP is HIGH AND CP is Trehalose AND IF Velocity is<br>Fast AND IF %CP is MID-3  | THEN $\Delta$ PdI is | LOW<br>(1.00) |
| 63. IF %CP is LOW AND CP is Trehalose AND IF Velocity is<br>Fast AND IF %CP is MID-3   | THEN $\Delta$ PdI is | LOW<br>(0.96) |
| 64. IF %CP is LOW AND CP is Trehalose AND IF Velocity is<br>Fast AND IF %CP is LOW-1   | THEN $\Delta$ PdI is | LOW<br>(0.94) |
| 65. IF %CP is LOW AND CP is Trehalose AND IF Velocity is<br>Fast AND IF %CP is MID-2   | THEN $\Delta$ PdI is | LOW<br>(0.84) |
| 66. IF %CP is HIGH AND CP is Trehalose AND IF Velocity is<br>Fast AND IF %CP is HIGH-4 | THEN $\Delta$ PdI is | LOW<br>(0.69) |

---

|                                                                                     |                      |               |
|-------------------------------------------------------------------------------------|----------------------|---------------|
| 67. IF %CP is HIGH AND CP is Trehalose AND IF Velocity is Slow AND IF %CP is MID-3  | THEN $\Delta$ PdI is | LOW<br>(0.88) |
| 68. IF %CP is LOW AND CP is Trehalose AND IF Velocity is Slow AND IF %CP is MID-3   | THEN $\Delta$ PdI is | LOW<br>(0.81) |
| 69. IF %CP is LOW AND CP is Trehalose AND IF Velocity is Slow AND IF %CP is LOW-1   | THEN $\Delta$ PdI is | LOW<br>(0.79) |
| 70. IF %CP is LOW AND CP is Trehalose AND IF Velocity is Slow AND IF %CP is MID-2   | THEN $\Delta$ PdI is | LOW<br>(0.69) |
| 71. IF %CP is HIGH AND CP is Trehalose AND IF Velocity is Slow AND IF %CP is HIGH-4 | THEN $\Delta$ PdI is | LOW<br>(0.54) |

**Table S3.** Set of combined IF-THEN rules for  $\Delta$  ZP of the first NFL model. Degree of membership in parentheses.

| Rules for $\Delta$ ZP                                        |                     |             |
|--------------------------------------------------------------|---------------------|-------------|
| 1. IF %CP is LOW AND IF CP is Fructose AND Velocity is Fast  | THEN $\Delta$ ZP is | LOW (0.51)  |
| 2. IF %CP is HIGH AND IF CP is Fructose AND Velocity is Fast | THEN $\Delta$ ZP is | HIGH (0.67) |
| 3. IF %CP is LOW AND IF CP is Fructose AND Velocity is Slow  | THEN $\Delta$ ZP is | LOW (0.54)  |
| 4. IF %CP is HIGH AND IF CP is Fructose AND Velocity is Slow | THEN $\Delta$ ZP is | HIGH (0.64) |
| 5. IF %CP is LOW AND IF CP is Glucose AND Velocity is Fast   | THEN $\Delta$ ZP is | LOW (0.99)  |
| 6. IF %CP is HIGH AND IF CP is Glucose AND Velocity is Fast  | THEN $\Delta$ ZP is | LOW (0.81)  |
| 7. IF %CP is LOW AND IF CP is Glucose AND Velocity is Slow   | THEN $\Delta$ ZP is | LOW (0.71)  |
| 8. IF %CP is HIGH AND IF CP is Glucose AND Velocity is Slow  | THEN $\Delta$ ZP is | LOW (0.54)  |
| 9. IF %CP is LOW AND IF CP is Lactose AND Velocity is Fast   | THEN $\Delta$ ZP is | HIGH (0.56) |
| 10. IF %CP is HIGH AND IF CP is Lactose AND Velocity is Fast | THEN $\Delta$ ZP is | HIGH (0.74) |



---

|                                                                |                     |             |
|----------------------------------------------------------------|---------------------|-------------|
| 11. IF %CP is LOW AND IF CP is Lactose AND Velocity is Slow    | THEN $\Delta$ ZP is | LOW (0.71)  |
| 12. IF %CP is HIGH AND IF CP is Lactose AND Velocity is Slow   | THEN $\Delta$ ZP is | LOW (0.54)  |
| 13. IF %CP is LOW AND IF CP is Mannitol AND Velocity is Fast   | THEN $\Delta$ ZP is | LOW (0.63)  |
| 14. IF %CP is HIGH AND IF CP is Mannitol AND Velocity is Fast  | THEN $\Delta$ ZP is | HIGH (0.55) |
| 15. IF %CP is LOW AND IF CP is Mannitol AND Velocity is Slow   | THEN $\Delta$ ZP is | LOW (0.83)  |
| 16. IF %CP is HIGH AND IF CP is Mannitol AND Velocity is Slow  | THEN $\Delta$ ZP is | LOW (0.66)  |
| 17. IF %CP is LOW AND IF CP is Sorbitol AND Velocity is Fast   | THEN $\Delta$ ZP is | LOW (0.83)  |
| 18. IF %CP is HIGH AND IF CP is Sorbitol AND Velocity is Fast  | THEN $\Delta$ ZP is | LOW (0.66)  |
| 19. IF %CP is LOW AND IF CP is Sorbitol AND Velocity is Slow   | THEN $\Delta$ ZP is | LOW (0.80)  |
| 20. IF %CP is HIGH AND IF CP is Sorbitol AND Velocity is Slow  | THEN $\Delta$ ZP is | LOW (0.62)  |
| 21. IF %CP is LOW AND IF CP is Sucrose AND Velocity is Fast    | THEN $\Delta$ ZP is | LOW (0.77)  |
| 22. IF %CP is HIGH AND IF CP is Sucrose AND Velocity is Fast   | THEN $\Delta$ ZP is | LOW (0.59)  |
| 23. IF %CP is LOW AND IF CP is Sucrose AND Velocity is Slow    | THEN $\Delta$ ZP is | LOW (0.73)  |
| 24. IF %CP is HIGH AND IF CP is Sucrose AND Velocity is Slow   | THEN $\Delta$ ZP is | LOW (0.55)  |
| 25. IF %CP is LOW AND IF CP is Trehalose AND Velocity is Fast  | THEN $\Delta$ ZP is | LOW (0.55)  |
| 26. IF %CP is HIGH AND IF CP is Trehalose AND Velocity is Fast | THEN $\Delta$ ZP is | HIGH (0.63) |

---

|                                                                |                     |            |
|----------------------------------------------------------------|---------------------|------------|
| 27. IF %CP is LOW AND IF CP is Trehalose AND Velocity is Slow  | THEN $\Delta$ ZP is | LOW (0.81) |
| 28. IF %CP is HIGH AND IF CP is Trehalose AND Velocity is Slow | THEN $\Delta$ ZP is | LOW (0.64) |

**Table S4.** Set of IF-THEN rules for  $\Delta$  size of the second NFL model. Degree of membership in parentheses.

| Rules for $\Delta$ size                 |                            |             |
|-----------------------------------------|----------------------------|-------------|
| <i>Submodel 1</i>                       |                            |             |
| 1. IF Osmolarity is LOW AND MW is LOW   | THEN $\Delta$ size (nm) is | LOW (1.00)  |
| 2. IF Osmolarity is LOW AND MW is MID   | THEN $\Delta$ size (nm) is | HIGH (1.00) |
| 3. IF Osmolarity is LOW AND MW is HIGH  | THEN $\Delta$ size (nm) is | LOW (0.64)  |
| 4. IF Osmolarity is MID AND MW is LOW   | THEN $\Delta$ size (nm) is | LOW (0.77)  |
| 5. IF Osmolarity is MID AND MW is MID   | THEN $\Delta$ size (nm) is | LOW (1.00)  |
| 6. IF Osmolarity is MID AND MW is HIGH  | THEN $\Delta$ size (nm) is | LOW (1.00)  |
| 7. IF Osmolarity is HIGH AND MW is LOW  | THEN $\Delta$ size (nm) is | HIGH (0.87) |
| 8. IF Osmolarity is HIGH AND MW is MID  | THEN $\Delta$ size (nm) is | LOW (1.00)  |
| 9. IF Osmolarity is HIGH AND MW is HIGH | THEN $\Delta$ size (nm) is | LOW (1.00)  |
| <i>Submodel 2</i>                       |                            |             |
| 10. IF Speed is Fast AND MW is LOW      | THEN $\Delta$ size (nm) is | LOW (0.77)  |
| 11. IF Speed is Fast AND MW is MID      | THEN $\Delta$ size (nm) is | HIGH (1.00) |
| 12. IF Speed is Fast AND MW is HIGH     | THEN $\Delta$ size (nm) is | LOW (0.89)  |
| 13. IF Speed is Slow AND MW is LOW      | THEN $\Delta$ size (nm) is | HIGH (0.77) |
| 14. IF Speed is Slow AND MW is MID      | THEN $\Delta$ size (nm) is | LOW (1.00)  |
| 15. IF Speed is Slow AND MW is HIGH     | THEN $\Delta$ size (nm) is | LOW (0.81)  |

It should be noted that the combination of inputs that led to the highest value of the output are highlighted in blue, while the combination of inputs giving the lowest value are highlighted in red.

**Table S5.** Set of IF-THEN rules for  $\Delta$  PdI of the second NFL model. Degree of membership in parentheses.

| Rules for $\Delta$ PdI                  |                      |             |
|-----------------------------------------|----------------------|-------------|
| <i>Submodel 1</i>                       |                      |             |
| 1. IF Osmolarity is LOW AND MW is LOW   | THEN $\Delta$ PdI is | LOW (0.67)  |
| 2. IF Osmolarity is LOW AND MW is MID   | THEN $\Delta$ PdI is | HIGH (1.00) |
| 3. IF Osmolarity is LOW AND MW is HIGH  | THEN $\Delta$ PdI is | HIGH (0.51) |
| 4. IF Osmolarity is MID AND MW is LOW   | THEN $\Delta$ PdI is | HIGH (0.69) |
| 5. IF Osmolarity is MID AND MW is MID   | THEN $\Delta$ PdI is | LOW (1.00)  |
| 6. IF Osmolarity is MID AND MW is HIGH  | THEN $\Delta$ PdI is | HIGH (0.65) |
| 7. IF Osmolarity is HIGH AND MW is LOW  | THEN $\Delta$ PdI is | HIGH (1.00) |
| 8. IF Osmolarity is HIGH AND MW is MID  | THEN $\Delta$ PdI is | LOW (1.00)  |
| 9. IF Osmolarity is HIGH AND MW is HIGH | THEN $\Delta$ PdI is | LOW (1.00)  |
| <i>Submodel 2</i>                       |                      |             |
| 10. IF Speed is Fast                    | THEN $\Delta$ PdI is | LOW (1.00)  |
| 11. IF Speed is Slow                    | THEN $\Delta$ PdI is | LOW (0.93)  |

It should be noted that the combination of inputs that led to the highest value of the output are highlighted in blue, while the combination of inputs giving the lowest value are highlighted in red.

**Table S6.** Set of IF-THEN rules for  $\Delta$  ZP of the second NFL model. Degree of membership in parentheses.

| Rules for $\Delta$ ZP    |                     |            |
|--------------------------|---------------------|------------|
| <i>Submodel 1</i>        |                     |            |
| 1. IF Osmolarity is LOW  | THEN $\Delta$ ZP is | LOW (0.65) |
| 2. IF Osmolarity is HIGH | THEN $\Delta$ ZP is | LOW (0.57) |

It should be noted that the combination of inputs that led to the highest value of the output are highlighted in blue, while the combination of inputs giving the lowest value are highlighted in red.

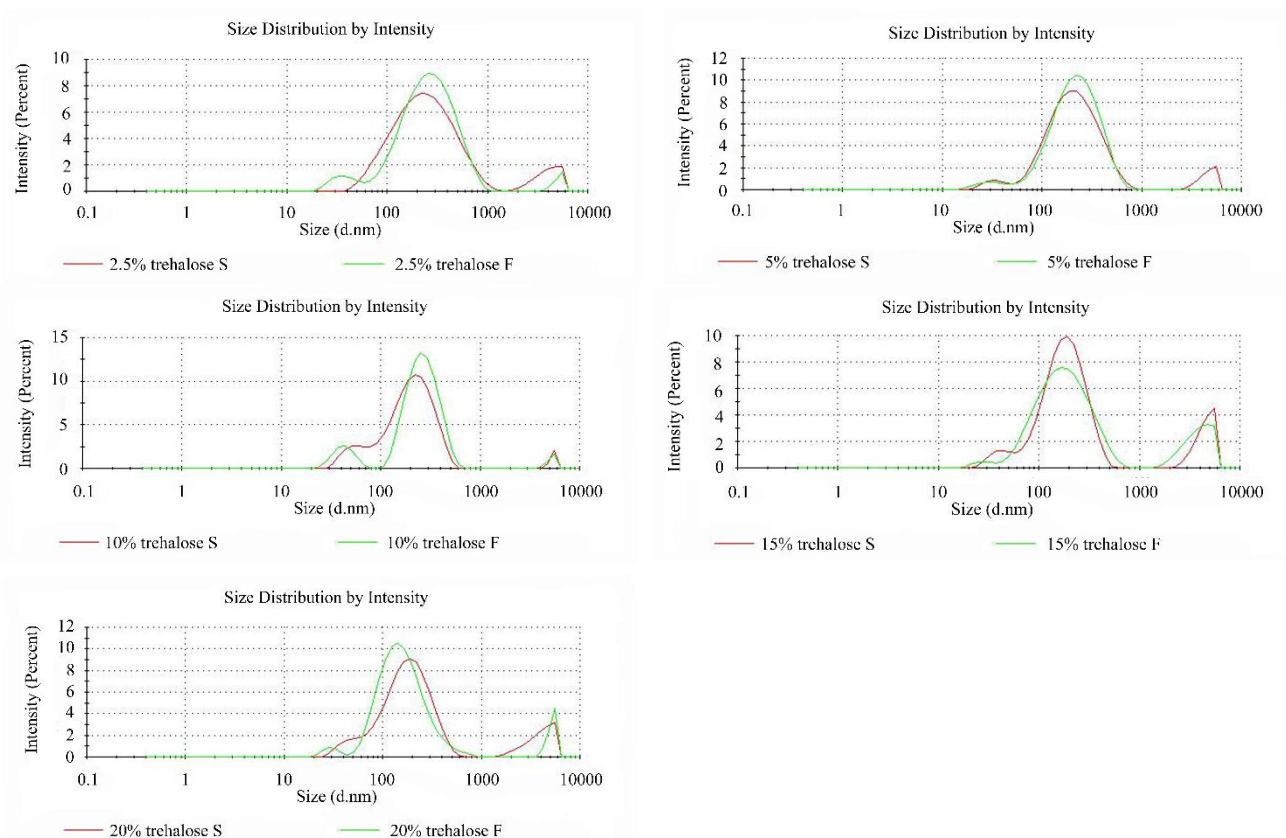

**Figure S1.** DLS measurements of NLC lyophilized using trehalose as cryoprotectant. S: Slow freezing speed, F: fast freezing speed.

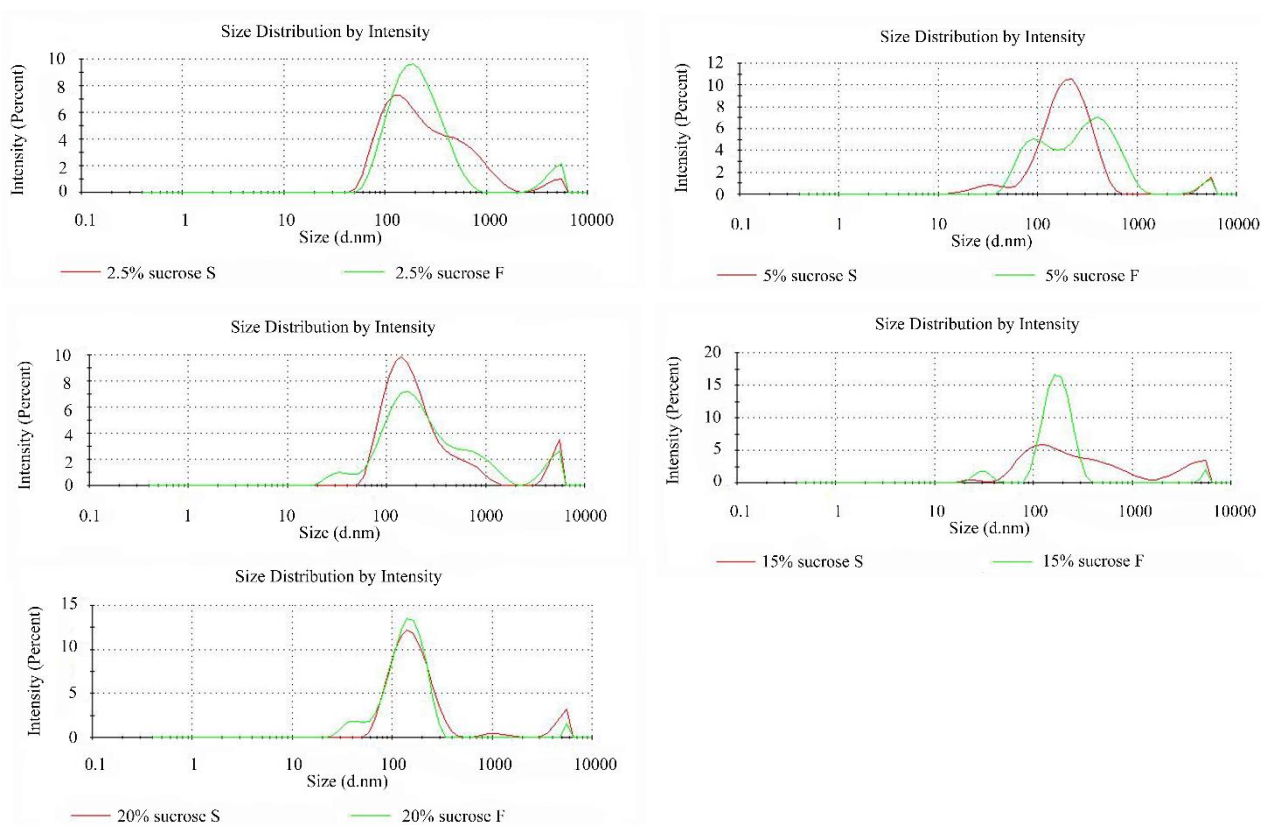

**Figure S2.** DLS measurements of re-suspended NLC lyophilized using sucrose as cryoprotectant. S: Slow freezing speed, F: fast freezing speed.

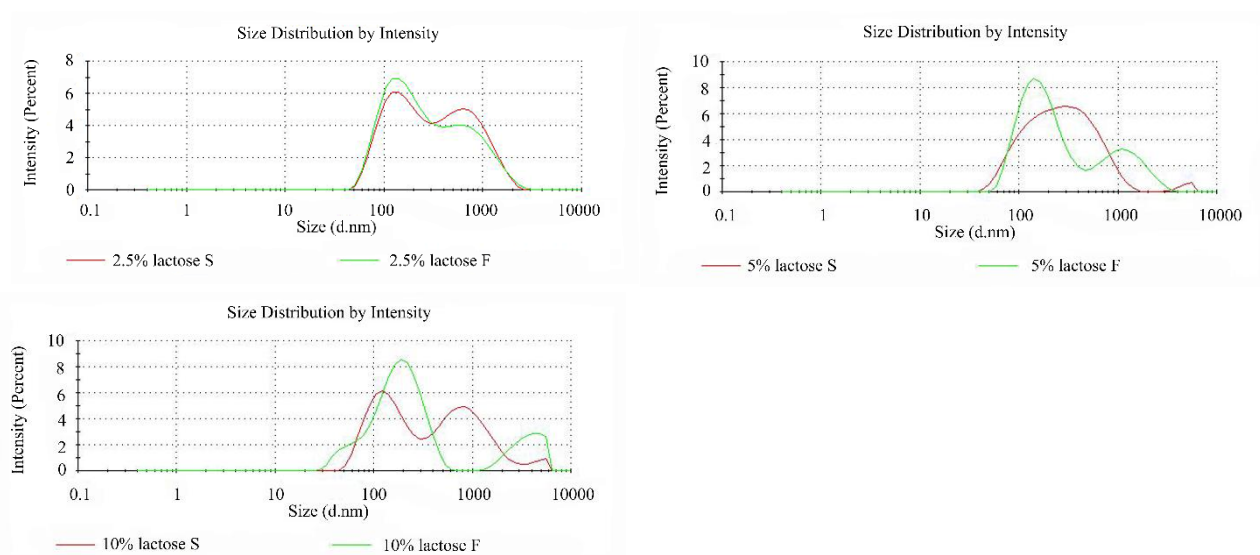

**Figure S3.** DLS measurements of re-suspended NLC lyophilized using lactose as cryoprotectant. S: Slow freezing speed, F: fast freezing speed.

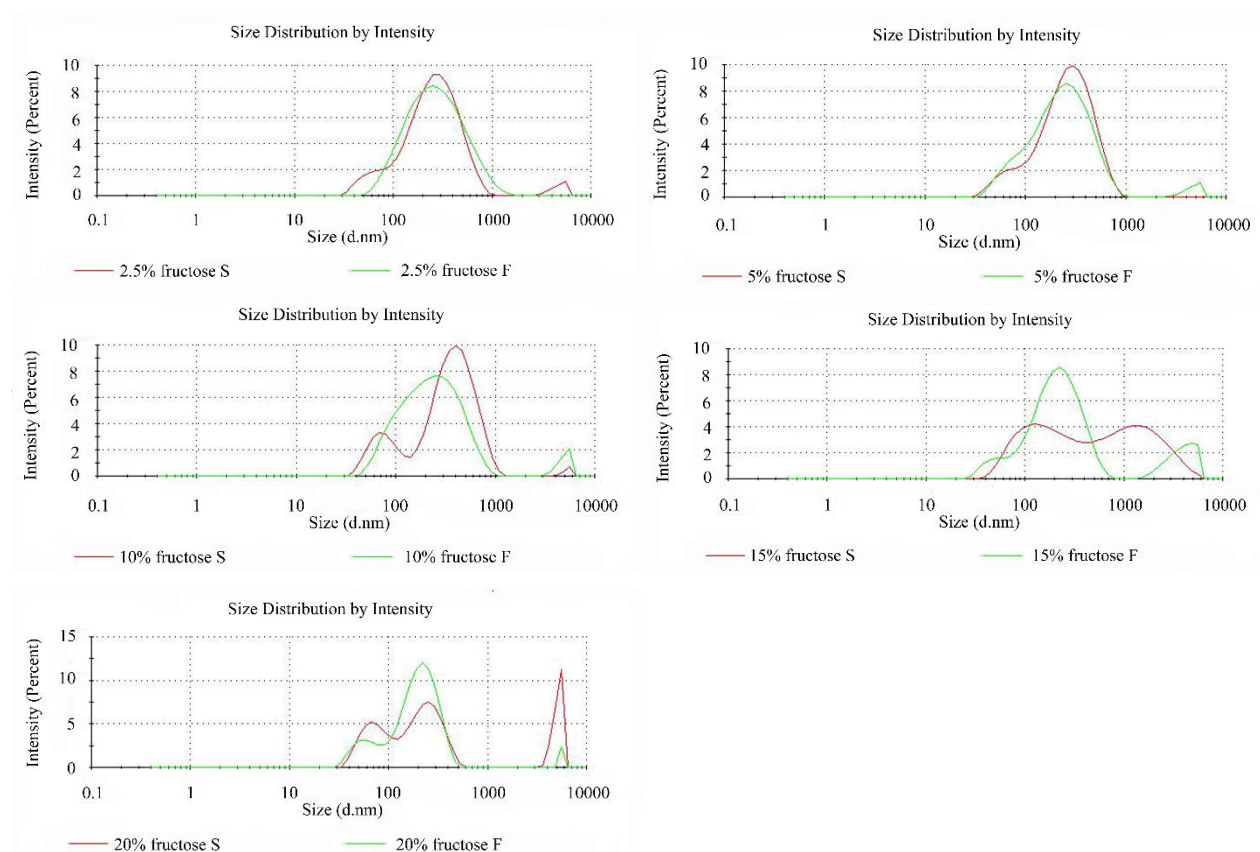

**Figure S4.** DLS measurements of re-suspended NLC lyophilized using fructose as cryoprotectant. S: Slow freezing speed, F: fast freezing speed.

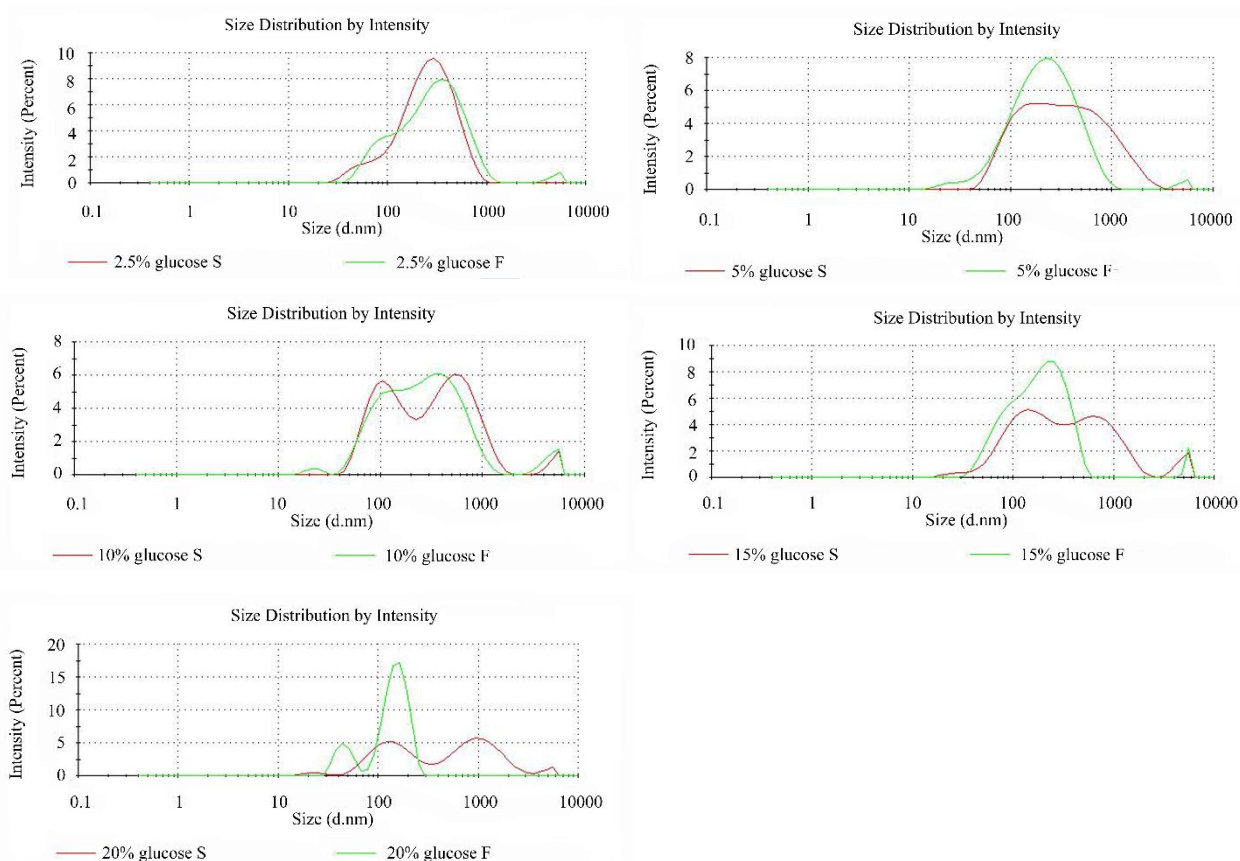

**Figure S5.** DLS measurements of re-suspended NLC lyophilized using glucose as cryoprotectant. S: Slow freezing speed, F: fast freezing speed.

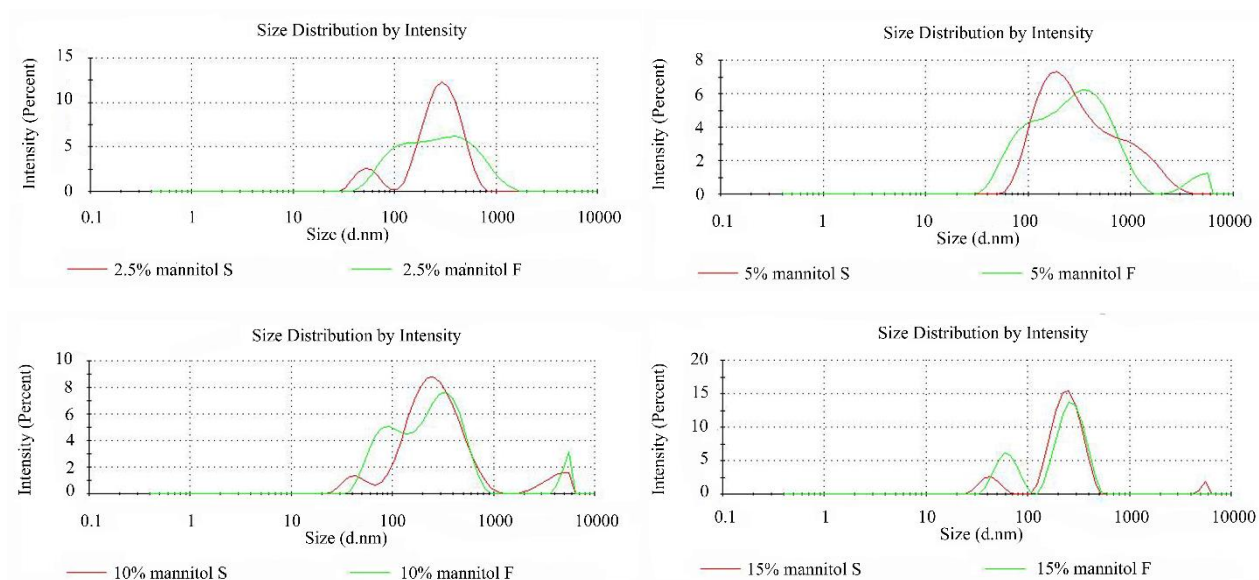

**Figure S6.** DLS measurements of re-suspended NLC lyophilized using mannitol as cryoprotectant. S: Slow freezing speed, F: fast freezing speed.



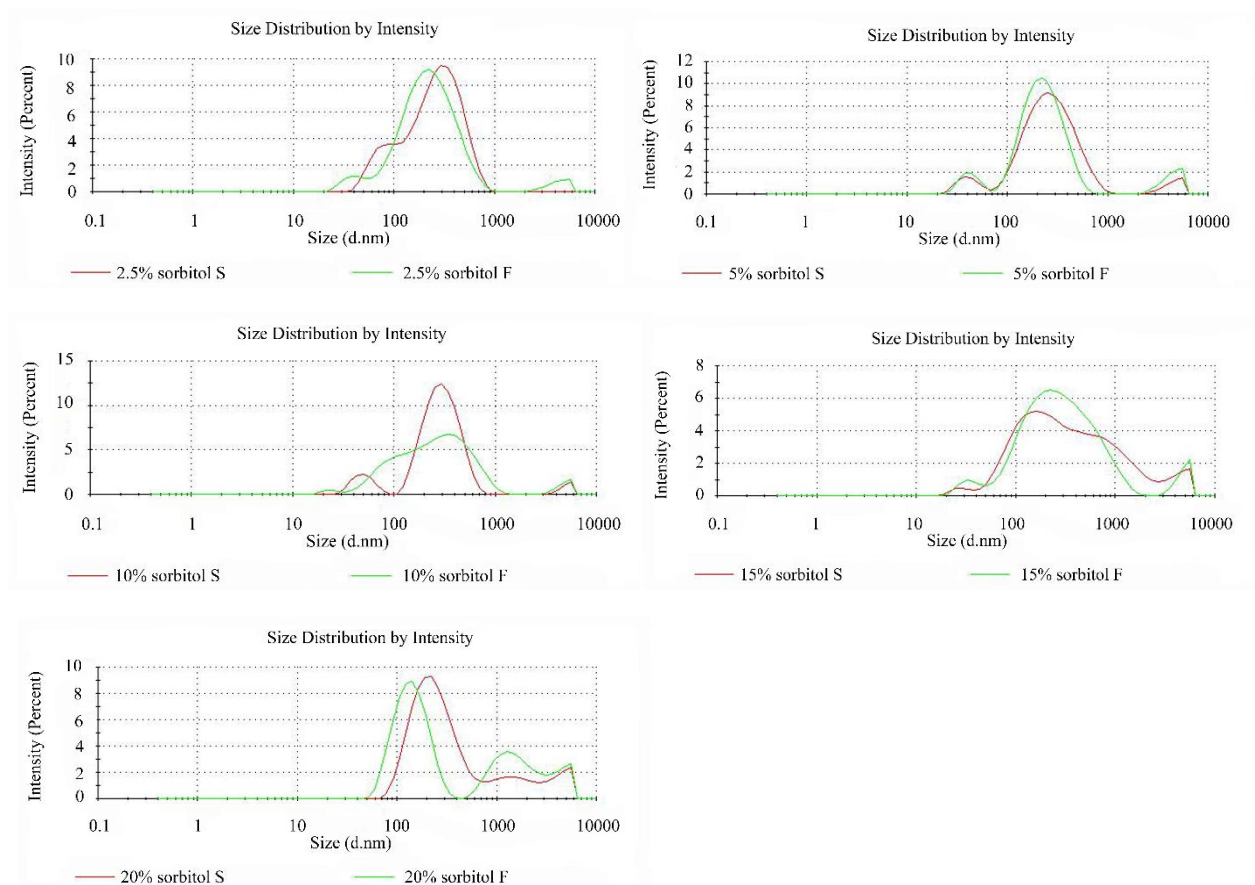

**Figure S7.** DLS measurements of re-suspended NLC lyophilized using sorbitol as cryoprotectant. S: Slow freezing speed, F: fast freezing speed.
